# Supplementary material for: Mertk Interacts with Tim-4 to Enhance Tim-4-Mediated Efferocytosis
Source: PubMed Central journal article supplement (PMC7408610; doi:10.3390/cells9071625), 2020-07-06
Supplement: cells-09-01625-s001.pdf [file cells-09-01625-s001.pdf]

# Supplementary Figures

## Mertk interacts with Tim-4 to enhance Tim-4-mediated efferocytosis

Byeongjin Moon<sup>1,2</sup>, Juyeon Lee<sup>1,2</sup>, Sang-Ah Lee<sup>1,2</sup>, Chanhyuk Min<sup>1,2</sup>, Hyunji Moon<sup>1,2</sup>, Deokhwan Kim<sup>1,2</sup>, Susumin Yang<sup>1,2</sup>, Heera Moon<sup>1</sup>, Jaeseon Jeon<sup>1</sup>, Young-Eun Joo<sup>3</sup>, Daeho Park<sup>1,2,\*</sup>

- <sup>1</sup> School of Life Sciences, Gwangju Institute of Science and Technology, Gwangju 61005, Korea; byeongjinmoon@gist.ac.kr (B.M.); iris260@gist.ac.kr (J.L.); sanga03@gist.ac.kr (S-A.L.); alscksgur@gist.ac.kr (C.M.); hjmoon311@gist.ac.kr (H.M.); po7322@gist.ac.kr (D.K.); susuminy@gist.ac.kr (S.Y.); gmlfk301@gist.ac.kr (H.M.); jeonjaeseon17@gist.ac.kr (J.J.); yejoo@chonnam.ac.kr (Y-E.J.)
- <sup>2</sup> Center for Cell Mechanobiology, Gwangju Institute of Science and Technology, Gwangju 61005, Korea
- <sup>3</sup> Department of Internal Medicine, Chonnam National University, Gwangju 61469, Korea
- \* Correspondence: daehopark@gist.ac.kr (D.P.); Tel.: 82-62-715-2890;

### \* Correspondence to

Daeho Park

School of Life Sciences

Gwangju Institute of Science and Technology

Gwangju 61005, Korea

Tel.: 82-62-715-2890

Fax: 82-62-715-2484

E-mail: [daehopark@gist.ac.kr](mailto:daehopark@gist.ac.kr)

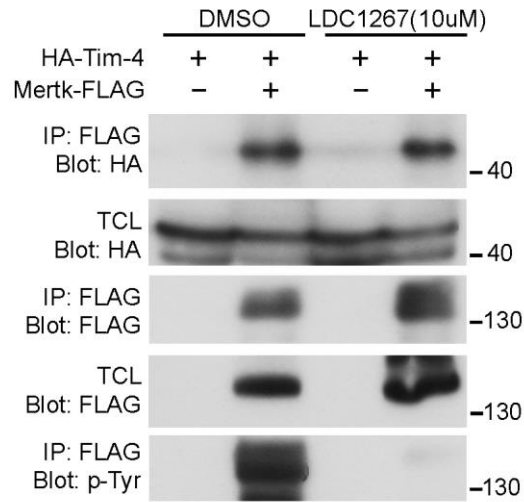

### Supplementary Figure 1

293T cells were transfected with the indicated plasmids. 2 d after transfection, the cells were treated with the indicated concentration of LDC1267 for 24 h. Then the cells were lysed, and FLAG-tagged Mertk was precipitated with anti-FLAG antibody-conjugated agarose beads. Bound proteins were detected with the indicated antibodies

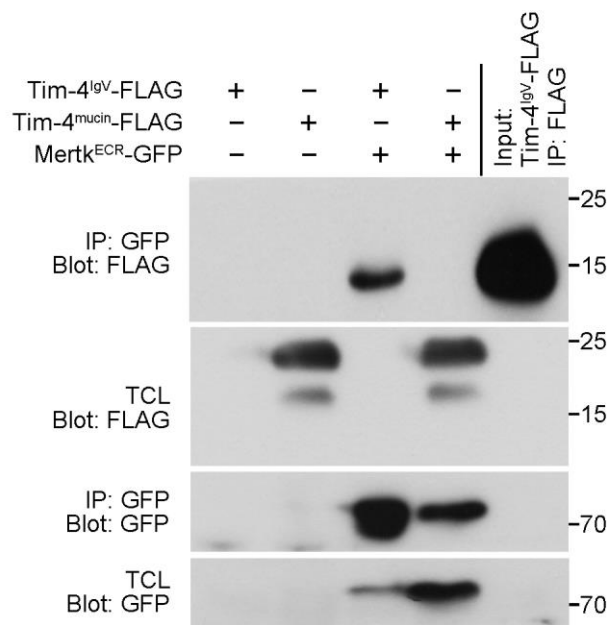

### Supplementary Figure 2

The lysates of 293T cells transfected with the indicated plasmids were incubated with an anti-GFP antibody and protein A/G agarose beads (lane 1-4) or anti-FLAG antibody-conjugated agarose beads (lane 5). Bound proteins were detected by immunoblotting. Input: the immunoprecipitants of the lysates of 293T cells transfected with Tim-4<sup>IgV</sup>-FLAG by an anti-FLAG antibody.



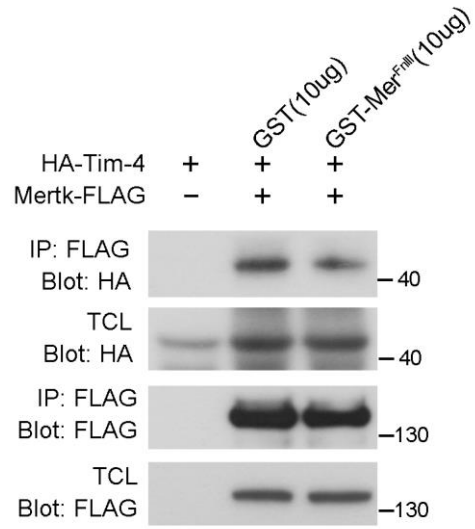

### Supplementary Figure 3

The lysates of 293T cells transfected with the indicated plasmids were incubated with anti-FLAG antibody-conjugated agarose beads in the presence of purified GST-Merk<sup>FnIII</sup> or GST. Bound proteins on the beads were detected by immunoblotting.

Tim-4      Mertk  
█ █ █  
 Co-localization

$$\text{Co-localization index} = \frac{\text{No. of pixel with the co-localization color}}{\text{No. of total pixels}}$$

|                       |  | GST                                                                               |                                                                                   |                                                                                   |                                                                                    |                                                                                     |
|-----------------------|--|-----------------------------------------------------------------------------------|-----------------------------------------------------------------------------------|-----------------------------------------------------------------------------------|------------------------------------------------------------------------------------|-------------------------------------------------------------------------------------|
| Image                 |  | 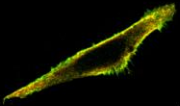 |  |  |  |  |
| Co-localization index |  | 0.74                                                                              | 0.71                                                                              | 0.62                                                                              | 0.47                                                                               | 0.63                                                                                |
|                       |  | GST-Mertk <sup>F<sup>nlII</sup></sup>                                             |                                                                                   |                                                                                   |                                                                                    |                                                                                     |
| Image                 |  |  |  |  |  |  |
| Co-localization index |  | 0.35                                                                              | 0.34                                                                              | 0.38                                                                              | 0.42                                                                               | 0.33                                                                                |

#### Supplementary Figure 4

The formula for the co-localization index is the number of pixels with a co-localization color divided by the number of total pixels (the formula shown above). The range of two colors from green (Mertk) to red (Tim-4) was set (shown top), and the pixels in the middle range of the color (yellowish) was counted using ImageJ. Representative images and their co-localization indexes are shown.

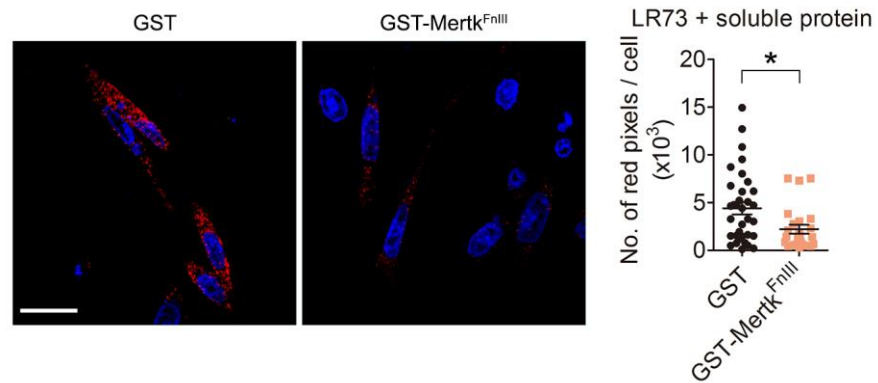

### Supplementary Figure 5

A proximity ligation assay was performed using LR73 cells transfected with the indicated plasmids. 1 d after transfection, the cells were incubated with GST or GST-Mertk<sup>F<sup>n</sup>III</sup> for 2 h, fixed, blocked, and incubated with anti-FLAG and anti-Tim-4<sup>tail</sup> antibodies. The cells then were incubated with the amplification solution at 37 °C overnight. Images were acquired by confocal microscopy and quantified (F, n $\geq$ 24 cells). Scale bar, 40  $\mu$ m.
